# Supplementary material for: Er3+/Yb3+ codoped phosphor Ba3Y4O9 with intense red upconversion emission and optical temperature sensing behavior
Source: Royal Society of Chemistry journal article supplement (doi:10.1039/c7tc05796b), 2018-01-01
Supplement: c7tc05796b1.pdf [file c7tc05796b1.pdf]

## Supplementary Information

### **Er<sup>3+</sup>/Yb<sup>3+</sup> codoped phosphor Ba<sub>3</sub>Y<sub>4</sub>O<sub>9</sub> with intense red upconversion emission and optical temperature sensing behavior**

Hao Wu,<sup>a,b</sup> Zhendong Hao,<sup>a\*</sup> Liangliang Zhang,<sup>a</sup> Xia Zhang,<sup>a</sup> Yu Xiao,<sup>a,b</sup> Guo-Hui Pan,<sup>a</sup> Huajun Wu,<sup>a</sup> Yongshi Luo,<sup>a</sup> Ligong Zhang<sup>a</sup> and Jiahua Zhang<sup>a\*</sup>

<sup>a</sup> State Key Laboratory of Luminescence and Applications, Changchun Institute of Optics, Fine Mechanics and Physics, Chinese Academy of Sciences, Changchun, 130033, China

<sup>b</sup> University of Chinese Academy of Sciences, Beijing, 100049, China

Corresponding author\*

Email: [haozd@ciomp.ac.cn](mailto:haozd@ciomp.ac.cn); [zhangjh@ciomp.ac.cn](mailto:zhangjh@ciomp.ac.cn)

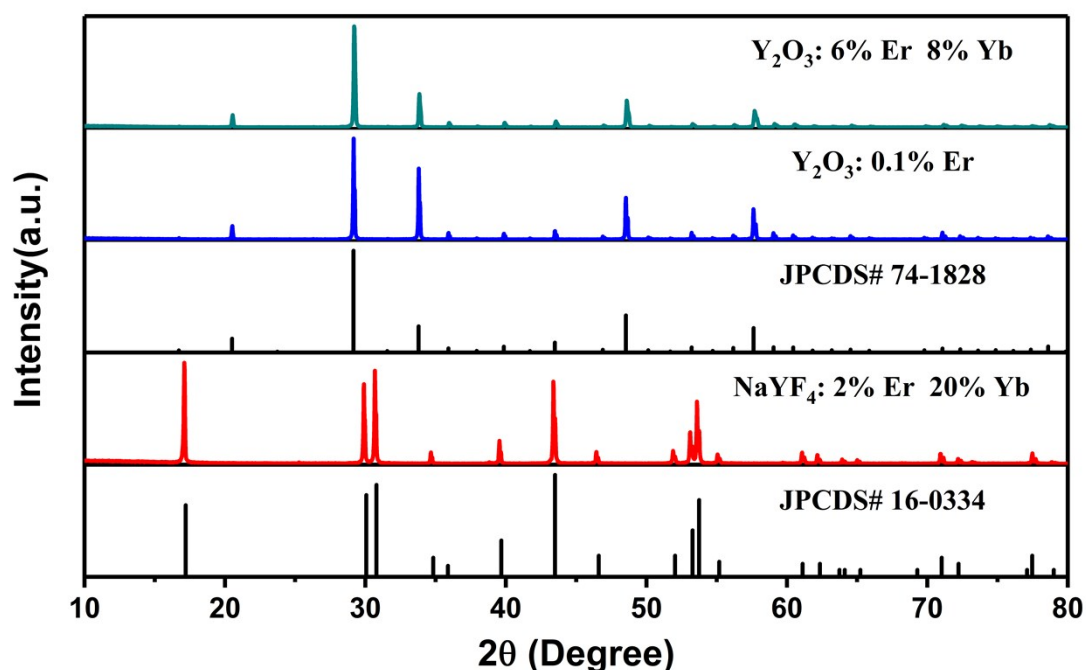

**Fig. S1** X-ray diffraction patterns of  $\text{Y}_2\text{O}_3$  and  $\beta\text{-NaYF}_4$  with particular  $\text{Er}^{3+}$ ,  $\text{Yb}^{3+}$  doped or codoped concentration. The standard patterns are also presented as references.

### Evaluating emission efficiency of ${}^4F_{9/2}$ level and radiative lifetime in $Ba_3Y_4O_9$ .

The PL spectra of  $Ba_3Y_4O_9$  and  $Y_2O_3$  with the singly 0.1% $Er^{3+}$  doped concentration were recorded under 650nm excitation in **Figure 5a**, and the full spectra shape of red emission are also presented (red dashed line). We simplify the scheme of possible decay pathways by assuming that  ${}^4I_{9/2}$  level can rapidly and completely relax down to  ${}^4I_{11/2}$  level by multiphonon-relaxation (MPR) due to the small energy gap of  $\sim 2200\text{cm}^{-1}$ . There is no MPR process from  ${}^4I_{13/2}$  level due to the large energy gap  $\sim 6500\text{cm}^{-1}$ , which is five times larger than the maximum phonon energy in oxide hosts. According to the previously reported radiative branch ratios from  ${}^4F_{9/2}$  to various lower states of  $Er^{3+}$  in various hosts,<sup>1-15</sup>  ${}^4F_{9/2} \rightarrow {}^4I_{15/2}$  is the dominant radiative transition with the branch ratio around 91% ( $\beta_{40} \approx 0.91$ ), while the others  ${}^4F_{9/2} \rightarrow {}^4I_{13/2}$  ( $\beta_{41} \approx 0.05$ ) and  ${}^4F_{9/2} \rightarrow {}^4I_{11/2}$  ( $\beta_{42} \approx 0.04$ ) can be nearly neglected. Under direct excitation to  ${}^4F_{9/2}$  at 650nm, the set of rate equations are expressed below using the model portrayed in **Figure 5b**:

$$\frac{dn_4}{dt} = \sigma_4 \Phi_{650} n_0 - \alpha_4 n_4 - W_4 n_4 \quad (S1)$$

$$\frac{dn_3}{dt} = \alpha_{43} n_4 + W_4 n_4 - W_3 n_3 \quad (S2)$$

$$\frac{dn_2}{dt} = \alpha_{42} n_4 + W_3 n_3 - \alpha_2 n_2 - W_2 n_2 \quad (S3)$$

$$\frac{dn_1}{dt} = \alpha_{41} n_4 + \alpha_{21} n_2 + W_2 n_2 - \alpha_1 n_1 \quad (S4)$$

$$1 = \sum \beta_{ij} \quad (i > j) \quad (S5)$$

$$\alpha_{ij} = \alpha_i \beta_{ij} \quad (S6)$$

where  $n_i$  is the population of level  $i$ ,  $\sigma_4$  is the absorption cross section of  ${}^4F_{9/2}$ , and  $\Phi_{650}$  is the excitation photon flux. The  $\beta_{ij}$  is the branching ratio from the  $i$ th level to the  $j$ th level. The  $\alpha_i$  and  $W_i$  represent the radiative rate and MPR rate of  $i$ th level, respectively. Considering the low efficiency of red emission in oxide and the largest radiative branch ratios of  ${}^4F_{9/2} \rightarrow {}^4I_{15/2}$  transition, the contribution of radiative transition from  ${}^4F_{9/2}$  to each intermediate states can be ignored. Furthermore, the PL spectra were measured by continuous wave (CW) excitation, thus the steady state equations are expressed as:

$$\sigma_4 \Phi_{650} n_0 = \alpha_4 n_4 + W_4 n_4 \quad (S7)$$

$$W_4 n_4 = W_3 n_3 \quad (\text{S8})$$

$$W_3 n_3 = \alpha_2 n_2 + W_2 n_2 \quad (\text{S9})$$

$$\alpha_1 n_1 = \alpha_{21} n_2 + W_2 n_2 \quad (\text{S10})$$

The PL intensity (I) is proportional to the product of radiative rate and the population of emitting state:

$$I_{ij} \propto \alpha_{ij} n_i \quad (\text{S11})$$

where  $I_{ij}$  is transition integrated intensity from the  $i$ th level to the  $j$ th level. Further, the  ${}^4\text{I}_{13/2} \rightarrow {}^4\text{I}_{15/2}$  and  ${}^4\text{I}_{11/2} \rightarrow {}^4\text{I}_{15/2}$  transition intensity ratio can be expressed as:

$$\frac{I_{10}}{I_{20}} = \frac{(\alpha_{21} n_2 + W_2 n_2)}{\alpha_{20} n_2} \times R_{1500/1000} = \left( \frac{\beta_{21}}{\beta_{20}} + \frac{W_2}{\alpha_2 \beta_{20}} \right) \times R_{1500/1000} \quad (\text{S12})$$

where,  $R_{1500/1000}$  is the coefficient for detector response and transition frequency ratio of 1500nm to 1000nm. According to the theoretical calculation of different  $\text{Er}^{3+}$  doped hosts previously (**Table S1**), the branching ratio of  ${}^4\text{I}_{11/2}$  and  ${}^4\text{F}_{9/2}$  level in different host materials are approximately identical. Thus, we regard the average values of composite oxide as the branching ratio of  ${}^4\text{I}_{11/2}$  and  ${}^4\text{F}_{9/2}$  level in  $\text{Ba}_3\text{Y}_4\text{O}_9$ . Taking  $\text{Y}_2\text{O}_3$  sample as a reference, the evaluated radiative lifetime and luminescence efficiency of  ${}^4\text{I}_{11/2}$  level were obtained using the equation:

$$\eta_i = \frac{\tau_i}{\tau_{ir}} = \frac{\alpha_i}{\alpha_i + W_i} \quad (\text{S13})$$

where  $\eta_i$  is the luminescence efficiency of  $i$ th level,  $\tau_i$  is the experimental lifetime ( $\tau_{\text{exp}}$ ) and  $\tau_{ir}$  is the calculated radiative lifetime ( $\tau_{\text{cal}}$ ) or evaluated radiative lifetime ( $\tau_{\text{eva}}$ ).

Moreover, the  ${}^4\text{I}_{11/2} \rightarrow {}^4\text{I}_{15/2}$  and  ${}^4\text{F}_{9/2} \rightarrow {}^4\text{I}_{15/2}$  transition intensity ratio can be expressed as:

$$\frac{I_{20}}{I_{40}} = \frac{\alpha_{20} W_4 n_4 / (\alpha_2 + W_2)}{\alpha_{40} n_4} R_{1000/650} = \frac{W_4}{\alpha_4 \beta_{40}} \times \eta_2 \times \beta_{20} \times R_{1000/650} \quad (\text{S14})$$

where  $R_{1000/650}$  is the coefficient for detector response and transition frequency ratio of 1000nm to 650nm. Taking  $\text{Y}_2\text{O}_3$  sample as a reference, the evaluated radiative lifetime and luminescence efficiency of  ${}^4\text{F}_{9/2}$  were obtained using **Equation S13** and the detailed parameters are listed in **Table S2,3**.

**Table S1. Comparison of branching ratio reported for  $^4I_{11/2}$  and  $^4F_{9/2}$  level of  $Er^{3+}$  in different host materials.**

|                     | $\beta_{21}(\%)$ | $\beta_{20}(\%)$ | $\beta_{43}(\%)$ | $\beta_{42}(\%)$ | $\beta_{41}(\%)$ | $\beta_{40}(\%)$ | Ref |
|---------------------|------------------|------------------|------------------|------------------|------------------|------------------|-----|
| $K_2YF_5$           | 28.7             | 71.3             | 0.2              | 3.9              | 4.2              | 91.7             | 1   |
| $\beta-NaYF_4$      | 16.2             | 83.8             | 0.6              | 8.4              | 3.8              | 87.2             | 2   |
| $KPb_2Cl_5$         | 18.4             | 81.6             | 0                | 3.8              | 4.2              | 92.0             | 3   |
| $CaGdAlO_4$         | 15.8             | 84.2             | 0.3              | 3.8              | 4.4              | 91.5             | 4   |
| $ErBa_3B_9O_{18}$   | 13               | 87               | 0                | 6                | 4                | 90               | 5   |
| $Y_2O_3$            | 10.8             | 89.2             | 2.1              | 0.8              | 4.8              | 92.3             | 6   |
| $CaSc_2O_4$         | 18.7             | 81.2             | 0.3              | 3.7              | 4.8              | 91.2             | 7   |
| $Gd_2SiO_5$         | 16.1             | 83.9             | 0.2              | 3.8              | 4.8              | 91.2             | 8   |
| $KGd(WO_4)_2$       | 20.4             | 79.6             | 0.7              | 5.7              | 5.5              | 88.1             | 9   |
| $Li_2Gd_4(MoO_4)_7$ | 13.7             | 86.3             | 0.8              | 4.1              | 5.8              | 89.3             | 10  |
| $Sr_3Y(BO_3)_3$     | 21.6             | 78.4             | 0.2              | 2.8              | 4.5              | 92.5             | 11  |
| $Y_2O_2S$           | 13.5             | 86.5             | 0.2              | 5.1              | 4.6              | 90.1             | 12  |
| YAG                 | -                | -                | 0.1              | 6.8              | 3.3              | 89.8             | 13  |
| $YAl_3(BO_3)_4$     | 12.9             | 87.1             | 0.2              | 4.1              | 4.5              | 91.2             | 14  |
| $YAlO_3$            | 14.5             | 85.5             | 0.2              | 4.3              | 4.0              | 91.5             | 15  |
| Oxide mean          | 15.5             | 84.5             | 0.4              | 4.3              | 4.6              | 90.7             |     |

**Table S2. The detailed parameters for evaluating radiative lifetime and luminescence efficiency of  $^4I_{11/2}$  level in  $Ba_3Y_4O_9$ .**

| 0.1%Er       | $\beta_{21}(\%)$ | $\beta_{20}(\%)$ | $\tau_{rad}$<br>(ms) | $\tau_{exp}$<br>(ms) | $I_{10}/I_{20}$ | $\tau_{eva}$<br>(ms) | $\eta_2(\%)$ |
|--------------|------------------|------------------|----------------------|----------------------|-----------------|----------------------|--------------|
| $Ba_3Y_4O_9$ | $\sim 15.5^a$    | $\sim 84.5^a$    | -                    | 1.852                | $1.29I_{1/2}^b$ | 4.700                | 39.66        |
| $Y_2O_3$     | 10.8             | 89.2             | 6.032                | 2.669                | $I_{1/2}^b$     | -                    | 44.25        |

<sup>a)</sup> Using the average values of composite oxide in **Table S1**.

<sup>b)</sup>  $I_{1/2}$  represents the  $^4I_{13/2} \rightarrow ^4I_{15/2}$  and  $^4I_{11/2} \rightarrow ^4I_{15/2}$  transition intensity ratio in  $Y_2O_3:0.1\%Er^{3+}$

**Table S3. The detailed parameters for evaluating radiative lifetime and luminescence efficiency of  $^4F_{9/2}$  level in  $Ba_3Y_4O_9$ .**

| 0.1%Er       | $\beta_{40}$ (%) | $\tau_{rad}$ ( $\mu$ s) | $\tau_{exp}$ ( $\mu$ s) | $I_{20}/I_{40}$ | $\tau_{eva}$ ( $\mu$ s) | $\eta_4$ (%) |
|--------------|------------------|-------------------------|-------------------------|-----------------|-------------------------|--------------|
| $Ba_3Y_4O_9$ | $\sim 90.7^a$    | -                       | 31.61                   | $0.66I_{2/4}^b$ | 879.28                  | 3.595        |
| $Y_2O_3$     | 92.3             | 737.53                  | 20.33                   | $I_{2/4}^b$     | -                       | 2.756        |

<sup>a)</sup> Using the average values of composite oxide in **Table S1**.

<sup>b)</sup>  $I_{2/4}$  represents the  $^4I_{11/2} \rightarrow ^4I_{15/2}$  and  $^4F_{9/2} \rightarrow ^4I_{15/2}$  transition intensity ratio in  $Y_2O_3:0.1\%Er^{3+}$

## References

- [1] P. A. Loiko, E. V. Vilejshikova, N. M. Khaidukov, M. N. Brekhovskikh, X. Mateos, M. Aguiló, K. V. Yumashev, *J. Lumin.*, 2016, **180**, 103.
- [2] G. Yao, C. Lin, Q. Meng, P. S. May, M. T. Berry, *J. Lumin.*, 2015, **160**, 276.
- [3] N. W. Jenkins, S. R. Bowman, S. O'Connor, S. K. Searles, J. Ganem, *Opt. Mater.*, 2003, **22**, 311.
- [4] J. H. Huang, X. H. Gong, Y. J. Chen, Y. F. Lin, Z. D. Luo, Y. D. Huang, *J. Alloy. Compd.*, 2014, **585**, 163.
- [5] M. He, T. Liu, J. Xiu, Y. Tang, Z. Zhang, *J. Spectrosc.*, 2015, 871320.
- [6] D. K. Sardar, K. L. Nash, R. M. Yow, G. B. Gruber, *J. Appl. Phys.*, 2007, **101**, 113115.
- [7] Ş. Georgescu, A. Ştefan, O. Toma, *J. Lumin.*, 2015, **167**, 186.
- [8] X. Xu, G. Zhao, F. Wu, W. Xu, Y. Zong, X. Wang, Z. Zhao, G. Zhou, J. Xu, *J. Cryst. Growth.*, 2008, **310**, 156.
- [9] M. C. Pujol, M. Rico, C. Zaldo, R. Solé, V. Nikolov, X. Solans, M. Aguiló, F. Díaz, *Appl. Phys. B-Lasers O.*, 1999, **68**, 187-197.
- [10] W. Zhao, L. Zhang, G. Wang, *J. Cryst. Growth.*, 2009, **311**, 2336.
- [11] D. Zhao, G. Wang, *J. Lumin.*, 2010, **130**, 424.
- [12] S. Buddhudu, F. J. Bryant, *J. Less-Common Met.*, 1989, **147**, 213.
- [13] D. K. Sardar, W. M. Bradley, J. J. Perez, J. B. Gruber, B. Zandi, J. A. Hutchinson, C. W. Trussell, M. R. Kokta, *J. Appl. Phys.*, 2003, **93**, 2602.
- [14] H. Jiang, J. Wang, X. Hu, H. Liu, X. Y. Liu, *Chem. Phys. Lett.*, 2002, **365**, 279.
- [15] Q. Dong, G. Zhao, D. Cao, J. Chen, Y. Ding, *J. Alloy. Compd.*, 2010, **493**, 661.
